# Supplementary material for: Incorporation of porphyrin acetylides into duplexes of the simplified nucleic acid GNA
Source: Royal Society of Chemistry journal article supplement (doi:10.1039/c0ob00439a), 2011-01-01

## Supplementary Information

# Incorporation of Porphyrin Acetylides into Duplexes of the Simplified Nucleic Acid GNA

Hui Zhou,<sup>a</sup> Andrew T. Johnson,<sup>b</sup> Olaf Wiest<sup>b</sup> and Lili Zhang<sup>\*a</sup>

<sup>a</sup>*Fachbereich Chemie, Philipps-Universität Marburg, Germany*

<sup>b</sup>*Department of Chemistry and Biochemistry, University of Notre Dame, Notre  
Dame, Indiana, USA*

### Tables of Contents:

1. Figure S1: Absorption spectra of GNA single strands with and without metals. a) **ON17**, **ON17<sup>Zn</sup>** and **ON17<sup>Ni</sup>**; b) **ON18**, **ON18<sup>Zn</sup>** and **ON18<sup>Ni</sup>**; c) **ON19**, **ON19<sup>Zn</sup>** and **ON19<sup>Ni</sup>**.....S2
2. Figure S2: UV-vis spectra of GNA duplexes and their corresponding single strands. a) **ON16<sup>Zn</sup>**, **ON17<sup>Zn</sup>** and **ON16<sup>Zn</sup>:ON17<sup>Zn</sup>**; b) **ON16<sup>Zn</sup>**, **ON17<sup>Ni</sup>** and **ON16<sup>Zn</sup>:ON17<sup>Ni</sup>**; c) **ON18**, **ON19** and **ON18:ON19**; d) **ON18<sup>Zn</sup>**, **ON19<sup>Zn</sup>** and **ON18<sup>Zn</sup>:ON19<sup>Zn</sup>**; e) **ON18<sup>Ni</sup>**, **ON19<sup>Ni</sup>** and **ON18<sup>Ni</sup>:ON19<sup>Ni</sup>**; f) **ON18<sup>Zn</sup>**, **ON19<sup>Ni</sup>** and **ON18<sup>Zn</sup>:ON19<sup>Ni</sup>**.....S3
3. Figure S3: Concentration-dependent UV-vis spectra of single strands **ON16**, **ON17** and their duplex **ON16:ON17**.....S4
4. Figure S4: Salt concentration-dependent UV-vis spectra of single strands **ON16**, **ON17** and their duplex **ON16:ON17**.....S5
5. Figure S5: Temperature-dependent UV-vis spectra of duplexes. a) **ON16<sup>Zn</sup>:ON17<sup>Zn</sup>**; b) **ON16<sup>Ni</sup>:ON17<sup>Ni</sup>**; c) **ON16<sup>Zn</sup>:ON17<sup>Ni</sup>**; d) **ON18:ON19**; e) **ON18<sup>Zn</sup>:ON19<sup>Zn</sup>**; f) **ON18<sup>Ni</sup>:ON19<sup>Ni</sup>**; g) **ON18<sup>Zn</sup>:ON19<sup>Ni</sup>** at Soret band region.....S6
6. Figure S6: Fluorescence spectra of a) **ON18**, **ON19** and **ON18:ON19**; b) **ON18<sup>Zn</sup>**, **ON19<sup>Zn</sup>** and **ON18<sup>Zn</sup>:ON19<sup>Zn</sup>**.....S7
7. Table S1: Maldi-TOF data of used oligonucleotides.....S8
8. NMR spectra of compounds **1** and **6**.....S9-S13
9. NMR spectra of compounds **2** to **5**.....S14-S17
10. HRMS of compounds **1** and **6**.....S18-S21

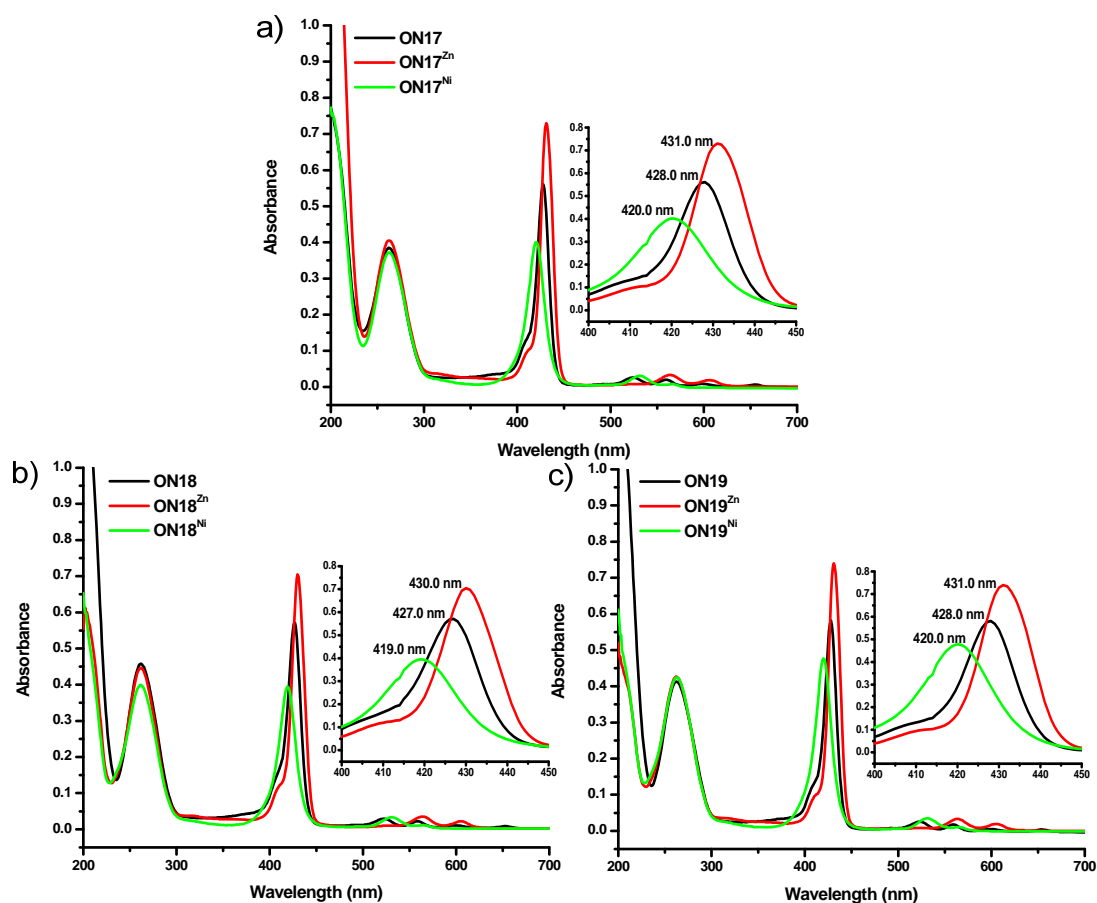

**Figure S1:** Absorption spectra of GNA single strands with and without metals. a) **ON17**, **ON17<sup>Zn</sup>** and **ON17<sup>Ni</sup>**; b) **ON18**, **ON18<sup>Zn</sup>** and **ON18<sup>Ni</sup>**; c) **ON19**, **ON19<sup>Zn</sup>** and **ON19<sup>Ni</sup>**. The insert shows the expanded porphyrin Soret band region. Conditions: 10 mM sodium phosphate, 100 mM NaCl, pH 7.0, and 2  $\mu$ M of single strands.

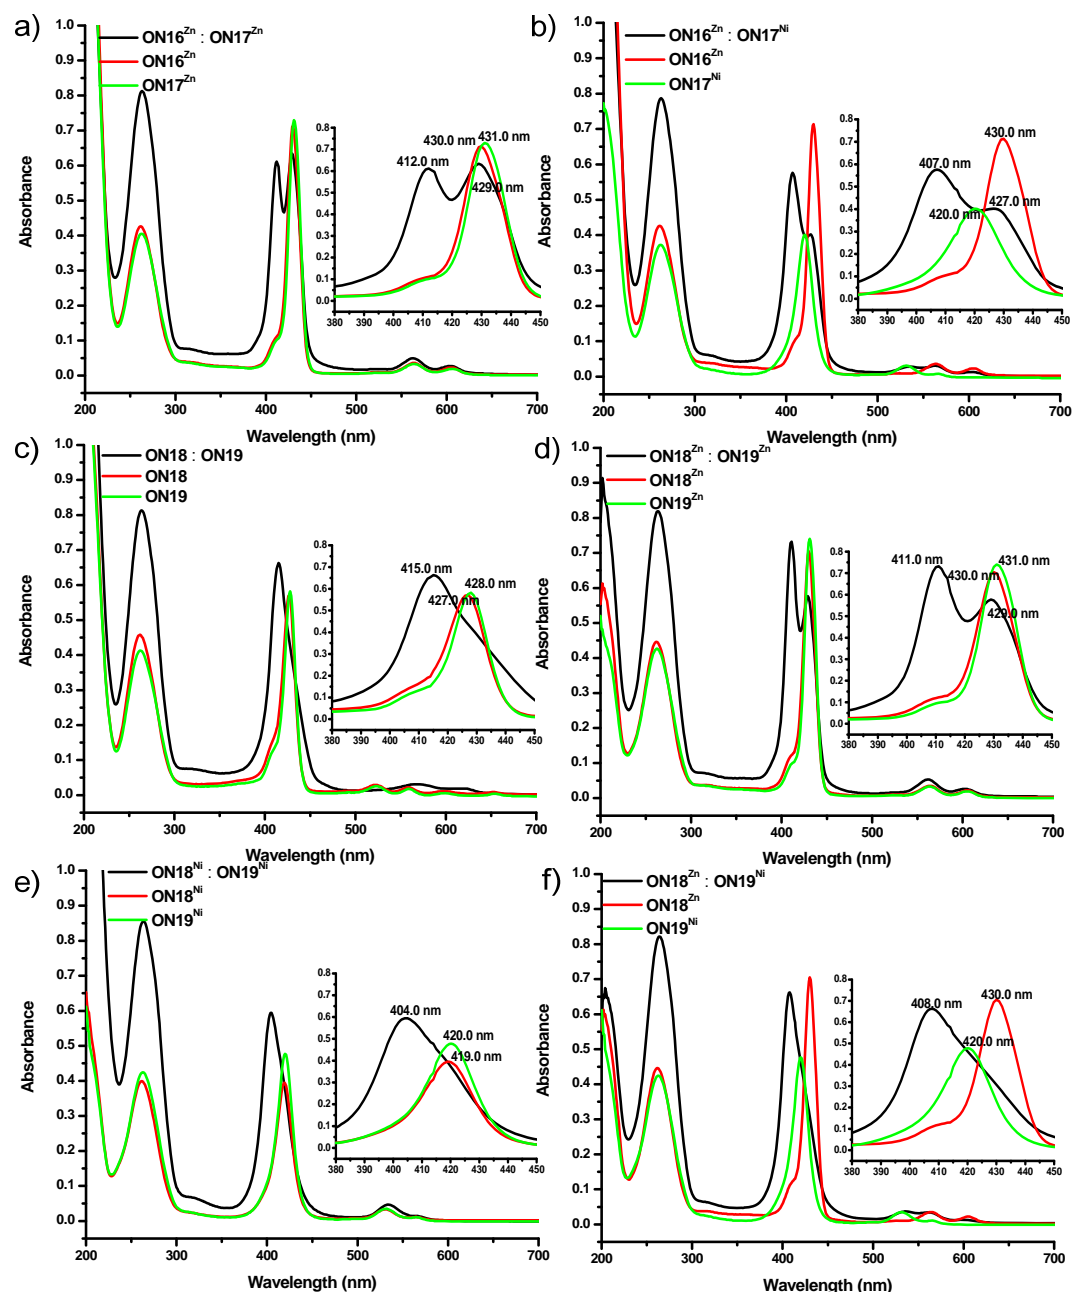

**Figure S2:** UV-vis spectra of GNA duplexes and their corresponding single strands. a) ON16<sup>Zn</sup>, ON17<sup>Zn</sup> and ON16<sup>Zn</sup>:ON17<sup>Zn</sup>; b) ON16<sup>Zn</sup>, ON17<sup>Ni</sup> and ON16<sup>Zn</sup>:ON17<sup>Ni</sup>; c) ON18, ON19 and ON18:ON19; d) ON18<sup>Zn</sup>, ON19<sup>Zn</sup> and ON18<sup>Zn</sup>:ON19<sup>Zn</sup>; e) ON18<sup>Ni</sup>, ON19<sup>Ni</sup> and ON18<sup>Ni</sup>:ON19<sup>Ni</sup>; f) ON18<sup>Zn</sup>, ON19<sup>Ni</sup> and ON18<sup>Zn</sup>:ON19<sup>Ni</sup>. The inserts show the expanded porphyrin Soret band regions. Conditions: 10 mM sodium phosphate, 100 mM NaCl, pH 7.0, and 2  $\mu$ M of each strand.

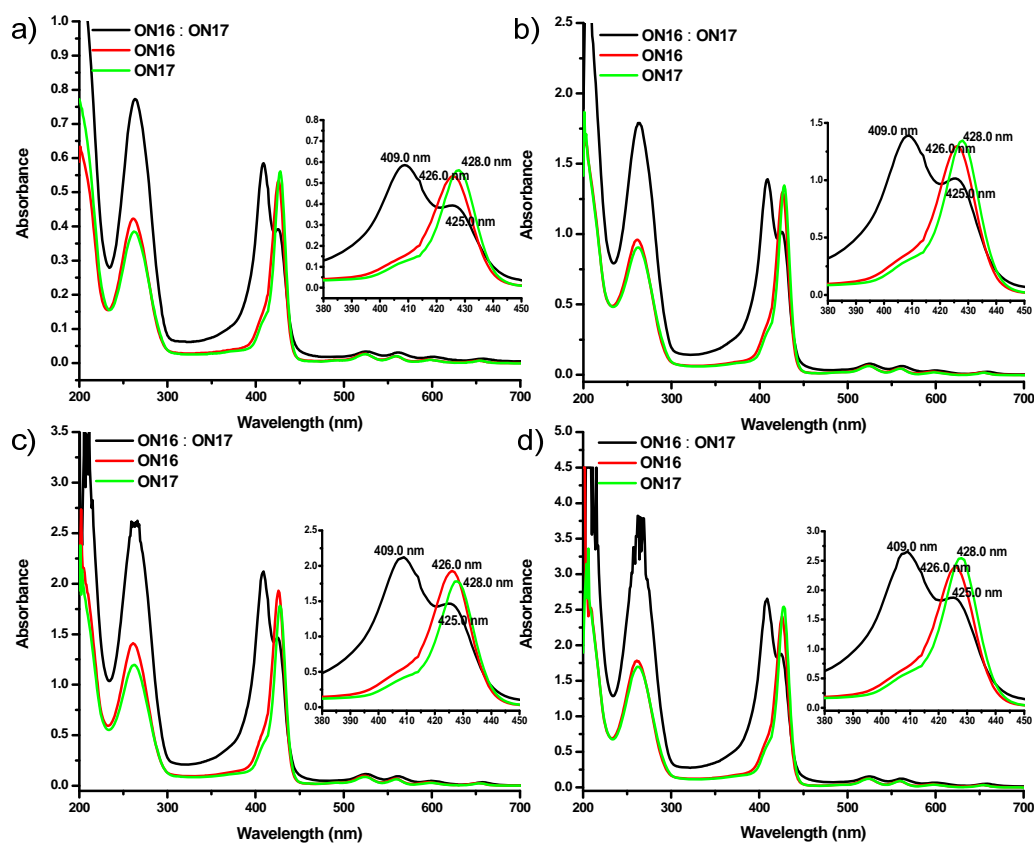

**Figure S3:** Concentration-dependent UV-vis spectra of single strands **ON16**, **ON17** and their duplex **ON16:ON17**. a) 2  $\mu\text{M}$  of each strand; b) 4  $\mu\text{M}$  of each strand; c) 6  $\mu\text{M}$  of each strand; d) 8  $\mu\text{M}$  of each strand. The inserts show the expanded porphyrin Soret band regions. Conditions: 10 mM sodium phosphate, 100 mM NaCl, pH 7.0.

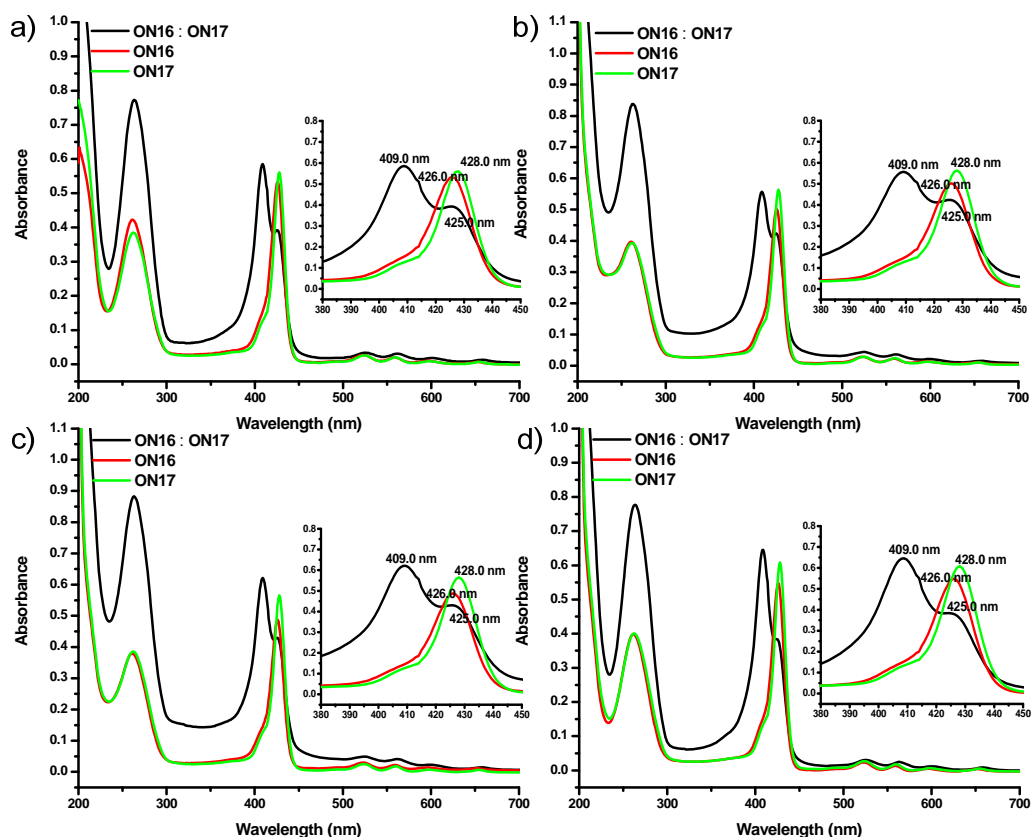

**Figure S4:** Salt concentration-dependent UV-vis spectra of single strands **ON16**, **ON17** and their duplex **ON16:ON17**. a) 100 mM NaCl; b) 200 mM NaCl; c) 400 mM NaCl; d) 800 mM NaCl. The inserts show the expanded porphyrin Soret band regions. Conditions: 10 mM sodium phosphate, pH 7.0, 2  $\mu$ M of each strand.

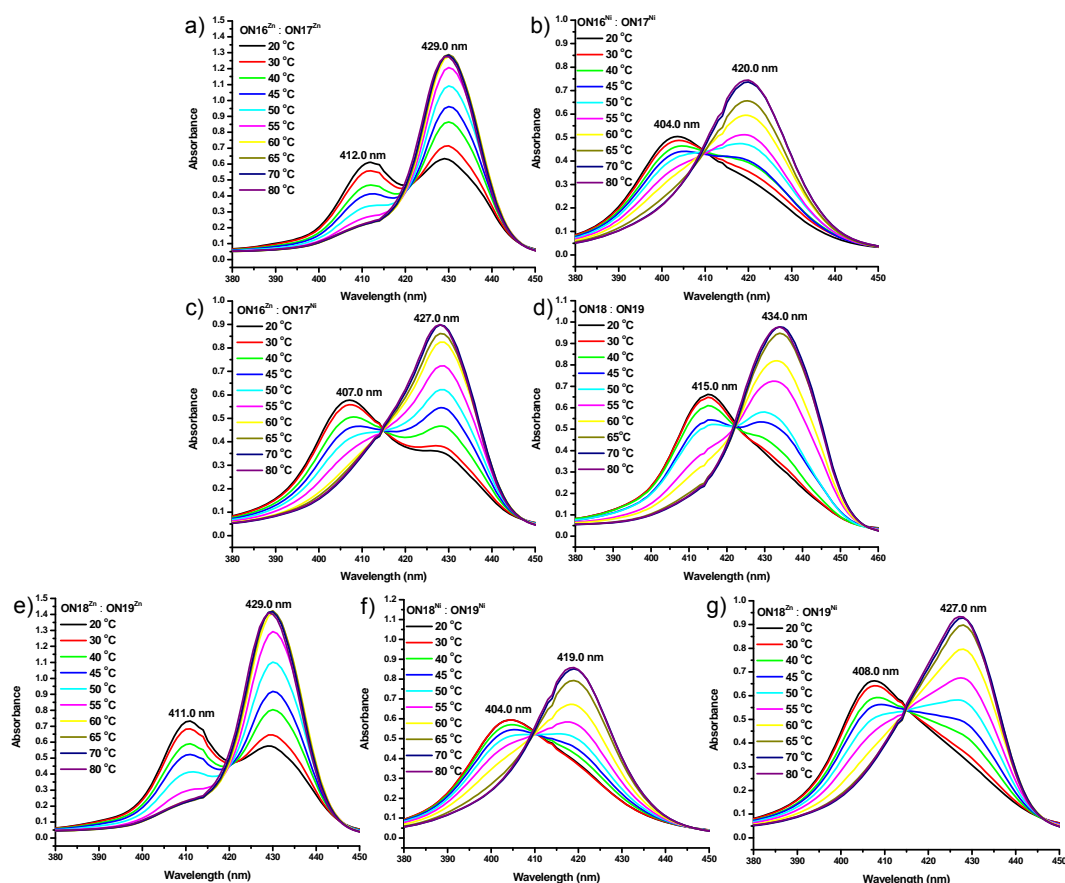

**Figure S5:** Temperature-dependent UV-vis spectra of duplexes. a) ON16<sup>Zn</sup>:ON17<sup>Zn</sup>; b) ON16<sup>Ni</sup>:ON17<sup>Ni</sup>; c) ON16<sup>Zn</sup>:ON17<sup>Ni</sup>; d) ON18:ON19; e) ON18<sup>Zn</sup>:ON19<sup>Zn</sup>; f) ON18<sup>Ni</sup>:ON19<sup>Ni</sup>; g) ON18<sup>Zn</sup>:ON19<sup>Ni</sup> at Soret band region. Conditions: 10 mM sodium phosphate, 100 mM NaCl, pH 7.0, 2  $\mu$ M of each strand.

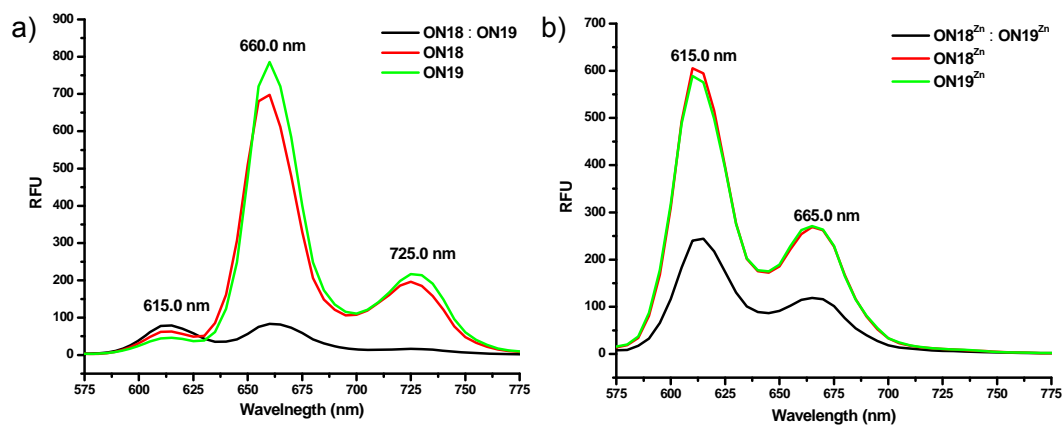

**Figure S6:** Fluorescence spectra of a) **ON18**, **ON19** and **ON18:ON19**; b) **ON18<sup>Zn</sup>**, **ON19<sup>Zn</sup>** and **ON18<sup>Zn</sup>:ON19<sup>Zn</sup>**. Conditions: 10 mM sodium phosphate, 100 mM NaCl, pH 7.0, and 2  $\mu$ M of each strand.

**Table S1.** Maldi-TOF data of used oligonucleotides.

| Name                | Oligonucleotides                             | M <sub>calcd</sub>                                                                                          | M <sub>found</sub> |
|---------------------|----------------------------------------------|-------------------------------------------------------------------------------------------------------------|--------------------|
| ON 1                | 3'-TAAAAATAATAATATT-2'                       | 4222.7(C <sub>128</sub> H <sub>167</sub> N <sub>62</sub> O <sub>74</sub> P <sub>15</sub> )                  | 4223.3             |
| ON 2                | 3'-AATATTATTATTTTTA-2'                       | 4186.6(C <sub>128</sub> H <sub>171</sub> N <sub>50</sub> O <sub>82</sub> P <sub>15</sub> )                  | 4185.5             |
| ON 3                | 3'-TAAAAATATAATATT-2'                        | 3951.5(C <sub>120</sub> H <sub>157</sub> N <sub>57</sub> O <sub>70</sub> P <sub>14</sub> )                  | 3949.3             |
| ON 4                | 3'-AATATTATATTTTTA-2'                        | 3924.5(C <sub>120</sub> H <sub>160</sub> N <sub>48</sub> O <sub>76</sub> P <sub>14</sub> )                  | 3923.2             |
| ON 5                | 3'-AATATTATAATTTTTA-2'                       | 4195.7(C <sub>128</sub> H <sub>170</sub> N <sub>53</sub> O <sub>80</sub> P <sub>15</sub> )                  | 4195.0             |
| ON 6                | 3'-TAAAAATPATAATATT-2'                       | 4574.1(C <sub>157</sub> H <sub>184</sub> N <sub>61</sub> O <sub>74</sub> P <sub>15</sub> )                  | 4574.3             |
| ON 6 <sup>Zn</sup>  | 3'-TAAAAATP <sup>Zn</sup> ATAATATT-2'        | 4637.5(C <sub>157</sub> H <sub>182</sub> N <sub>61</sub> O <sub>74</sub> P <sub>15</sub> Zn <sub>1</sub> )  | 4638.3             |
| ON 6 <sup>Ni</sup>  | 3'-TAAAAATP <sup>Ni</sup> ATAATATT-2'        | 4630.8(C <sub>157</sub> H <sub>182</sub> N <sub>61</sub> Ni <sub>1</sub> O <sub>74</sub> P <sub>15</sub> )  | 4630.5             |
| ON 7                | 3'-AATATTATHATTTTTA-2'                       | 4048.5(C <sub>122</sub> H <sub>165</sub> N <sub>48</sub> O <sub>80</sub> P <sub>15</sub> )                  | 4048.2             |
| ON 8                | 3'-TAAAAATTAATATT-2'                         | 3680.3(C <sub>112</sub> H <sub>147</sub> N <sub>52</sub> O <sub>66</sub> P <sub>13</sub> )                  | 3678.2             |
| ON 9                | 3'-AATATTAATTTTTA-2'                         | 3662.3(C <sub>112</sub> H <sub>149</sub> N <sub>46</sub> O <sub>70</sub> P <sub>13</sub> )                  | 3661.2             |
| ON 10               | 3'-TAAAAATPHTAATATT-2'                       | 4427.0(C <sub>151</sub> H <sub>179</sub> N <sub>56</sub> O <sub>74</sub> P <sub>15</sub> )                  | 4434.2             |
| ON 10 <sup>Zn</sup> | 3'-TAAAAATP <sup>Zn</sup> HTAATATT-2'        | 4490.4(C <sub>151</sub> H <sub>177</sub> N <sub>56</sub> O <sub>74</sub> P <sub>15</sub> Zn <sub>1</sub> )  | 4498.1             |
| ON 11               | 3'-AATATTA PHATTTTTA-2'                      | 4408.9(C <sub>151</sub> H <sub>181</sub> N <sub>50</sub> O <sub>78</sub> P <sub>15</sub> )                  | 4416.9             |
| ON 11 <sup>Zn</sup> | 3'-AATATTA P <sup>Zn</sup> ATTTTTA-2'        | 4472.3(C <sub>151</sub> H <sub>179</sub> N <sub>50</sub> O <sub>78</sub> P <sub>15</sub> Zn <sub>1</sub> )  | 4479.6             |
| ON 12               | 3'-TTATAAAAAATAATAATATTAAT-2'                | 5822.7(C <sub>176</sub> H <sub>230</sub> N <sub>83</sub> O <sub>104</sub> P <sub>21</sub> )                 | 5821.5             |
| ON 13               | 3'-ATTAATATTATTATTTTTATAA-2'                 | 5786.6(C <sub>176</sub> H <sub>234</sub> N <sub>71</sub> O <sub>112</sub> P <sub>21</sub> )                 | 5784.0             |
| ON 14               | 3'-TTATAAAAAATTAATATTAAT-2'                  | 5280.3(C <sub>160</sub> H <sub>210</sub> N <sub>73</sub> O <sub>96</sub> P <sub>19</sub> )                  | 5277.6             |
| ON 15               | 3'-ATTAATATTAATTTTTATAA-2'                   | 5262.3(C <sub>160</sub> H <sub>212</sub> N <sub>67</sub> O <sub>100</sub> P <sub>19</sub> )                 | 5260.5             |
| ON 16               | 3'-TTATAAAAAATPHTAATATTAAT-2'                | 6027.0(C <sub>199</sub> H <sub>242</sub> N <sub>77</sub> O <sub>104</sub> P <sub>21</sub> )                 | 6025.8             |
| ON 16 <sup>Zn</sup> | 3'-TTATAAAAAATP <sup>Zn</sup> HTAATATTAAT-2' | 6090.3(C <sub>199</sub> H <sub>240</sub> N <sub>77</sub> O <sub>104</sub> P <sub>21</sub> Zn <sub>1</sub> ) | 6088.3             |
| ON 16 <sup>Ni</sup> | 3'-TTATAAAAAATP <sup>Ni</sup> HTAATATTAAT-2' | 6083.6(C <sub>199</sub> H <sub>240</sub> N <sub>77</sub> Ni <sub>1</sub> O <sub>104</sub> P <sub>21</sub> ) | 6082.2             |
| ON 17               | 3'-ATTAATATTAPHATTTTTATAA-2'                 | 6008.9(C <sub>199</sub> H <sub>244</sub> N <sub>71</sub> O <sub>108</sub> P <sub>21</sub> )                 | 6006.6             |
| ON 17 <sup>Zn</sup> | 3'-ATTAATATTAP <sup>Zn</sup> HATTTTTATAA-2'  | 6072.3(C <sub>199</sub> H <sub>242</sub> N <sub>71</sub> O <sub>108</sub> P <sub>21</sub> Zn <sub>1</sub> ) | 6072.4             |
| ON 17 <sup>Ni</sup> | 3'-ATTAATATTAP <sup>Ni</sup> HATTTTTATAA-2'  | 6065.6(C <sub>199</sub> H <sub>242</sub> N <sub>71</sub> Ni <sub>1</sub> O <sub>108</sub> P <sub>21</sub> ) | 6068.0             |
| ON 18               | 3'-TTATAAAAAATHPTAATATTAAT-2'                | 6027.0(C <sub>199</sub> H <sub>242</sub> N <sub>77</sub> O <sub>104</sub> P <sub>21</sub> )                 | 6027.1             |
| ON 18 <sup>Zn</sup> | 3'-TTATAAAAAATHP <sup>Zn</sup> TAATATTAAT-2' | 6090.3(C <sub>199</sub> H <sub>240</sub> N <sub>77</sub> O <sub>104</sub> P <sub>21</sub> Zn <sub>1</sub> ) | 6089.2             |
| ON 18 <sup>Ni</sup> | 3'-TTATAAAAAATHP <sup>Ni</sup> TAATATTAAT-2' | 6083.6(C <sub>199</sub> H <sub>240</sub> N <sub>77</sub> Ni <sub>1</sub> O <sub>104</sub> P <sub>21</sub> ) | 6082.4             |
| ON 19               | 3'-ATTAATATTAHPATTTTTATAA-2'                 | 6008.9(C <sub>199</sub> H <sub>244</sub> N <sub>71</sub> O <sub>108</sub> P <sub>21</sub> )                 | 6006.7             |
| ON 19 <sup>Zn</sup> | 3'-ATTAATATTAHP <sup>Zn</sup> ATTTTTATAA-2'  | 6072.3(C <sub>199</sub> H <sub>242</sub> N <sub>71</sub> O <sub>108</sub> P <sub>21</sub> Zn <sub>1</sub> ) | 6072.4             |
| ON 19 <sup>Ni</sup> | 3'-ATTAATATTAHP <sup>Ni</sup> ATTTTTATAA-2'  | 6065.6(C <sub>199</sub> H <sub>242</sub> N <sub>71</sub> Ni <sub>1</sub> O <sub>108</sub> P <sub>21</sub> ) | 6064.8             |



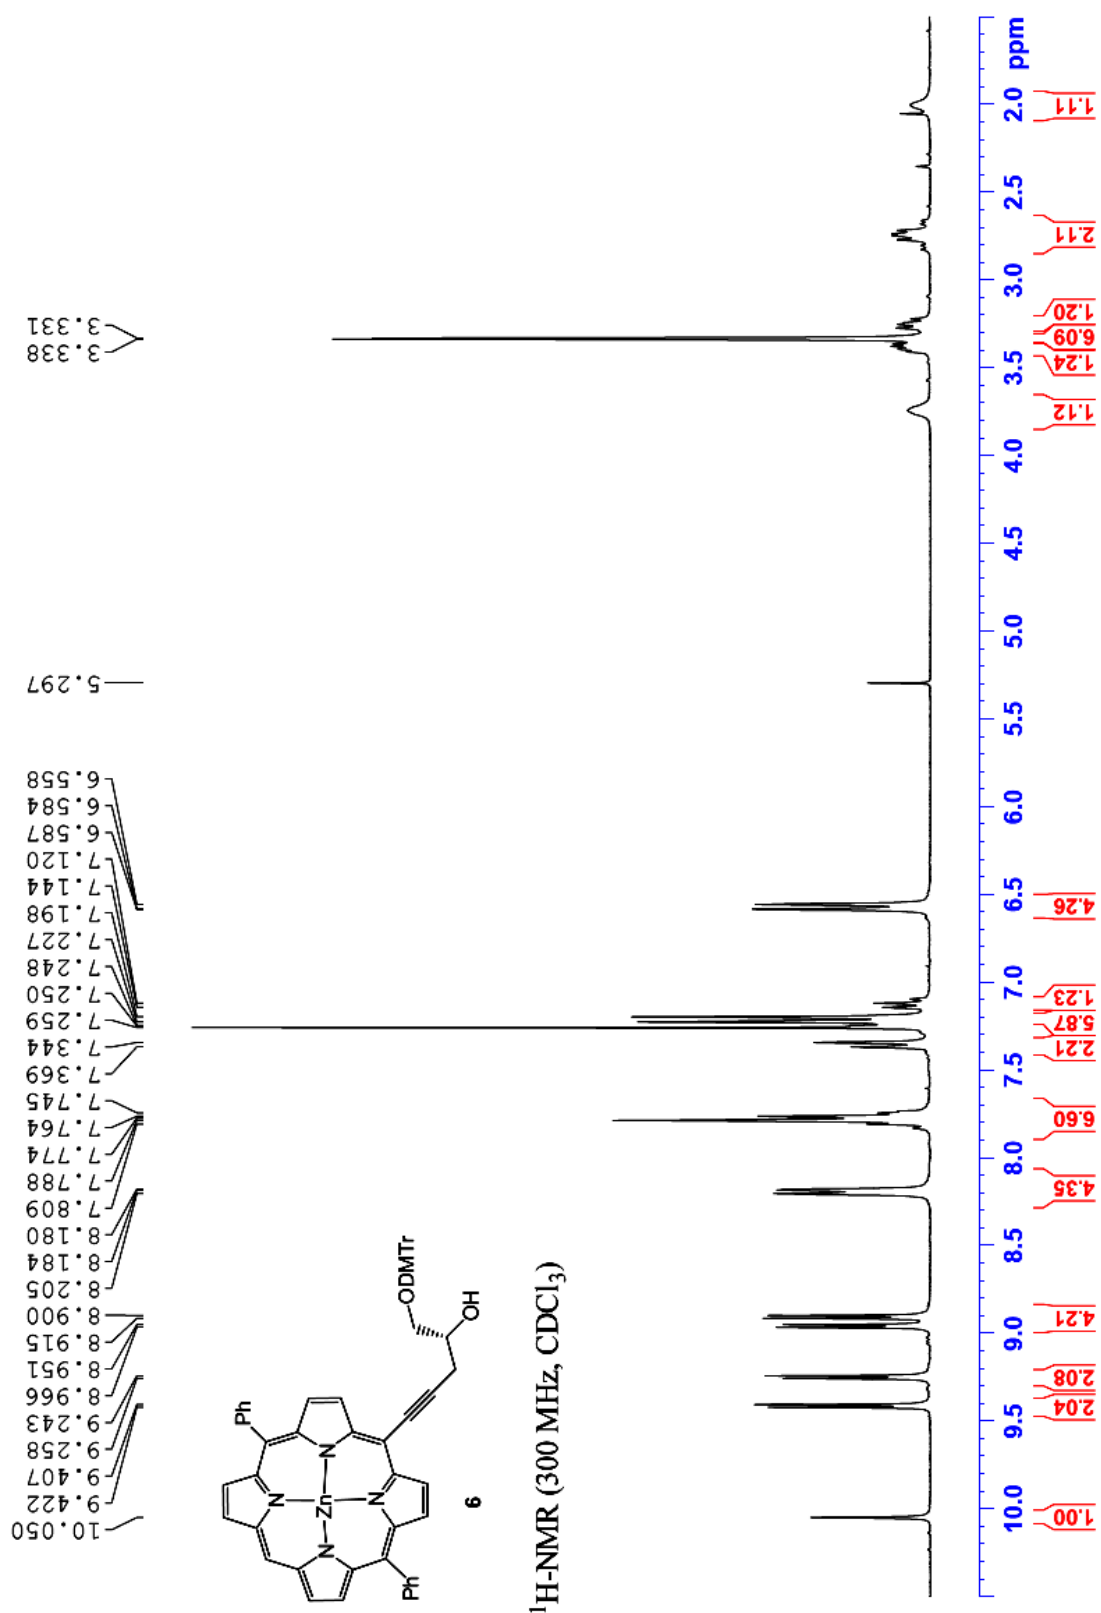

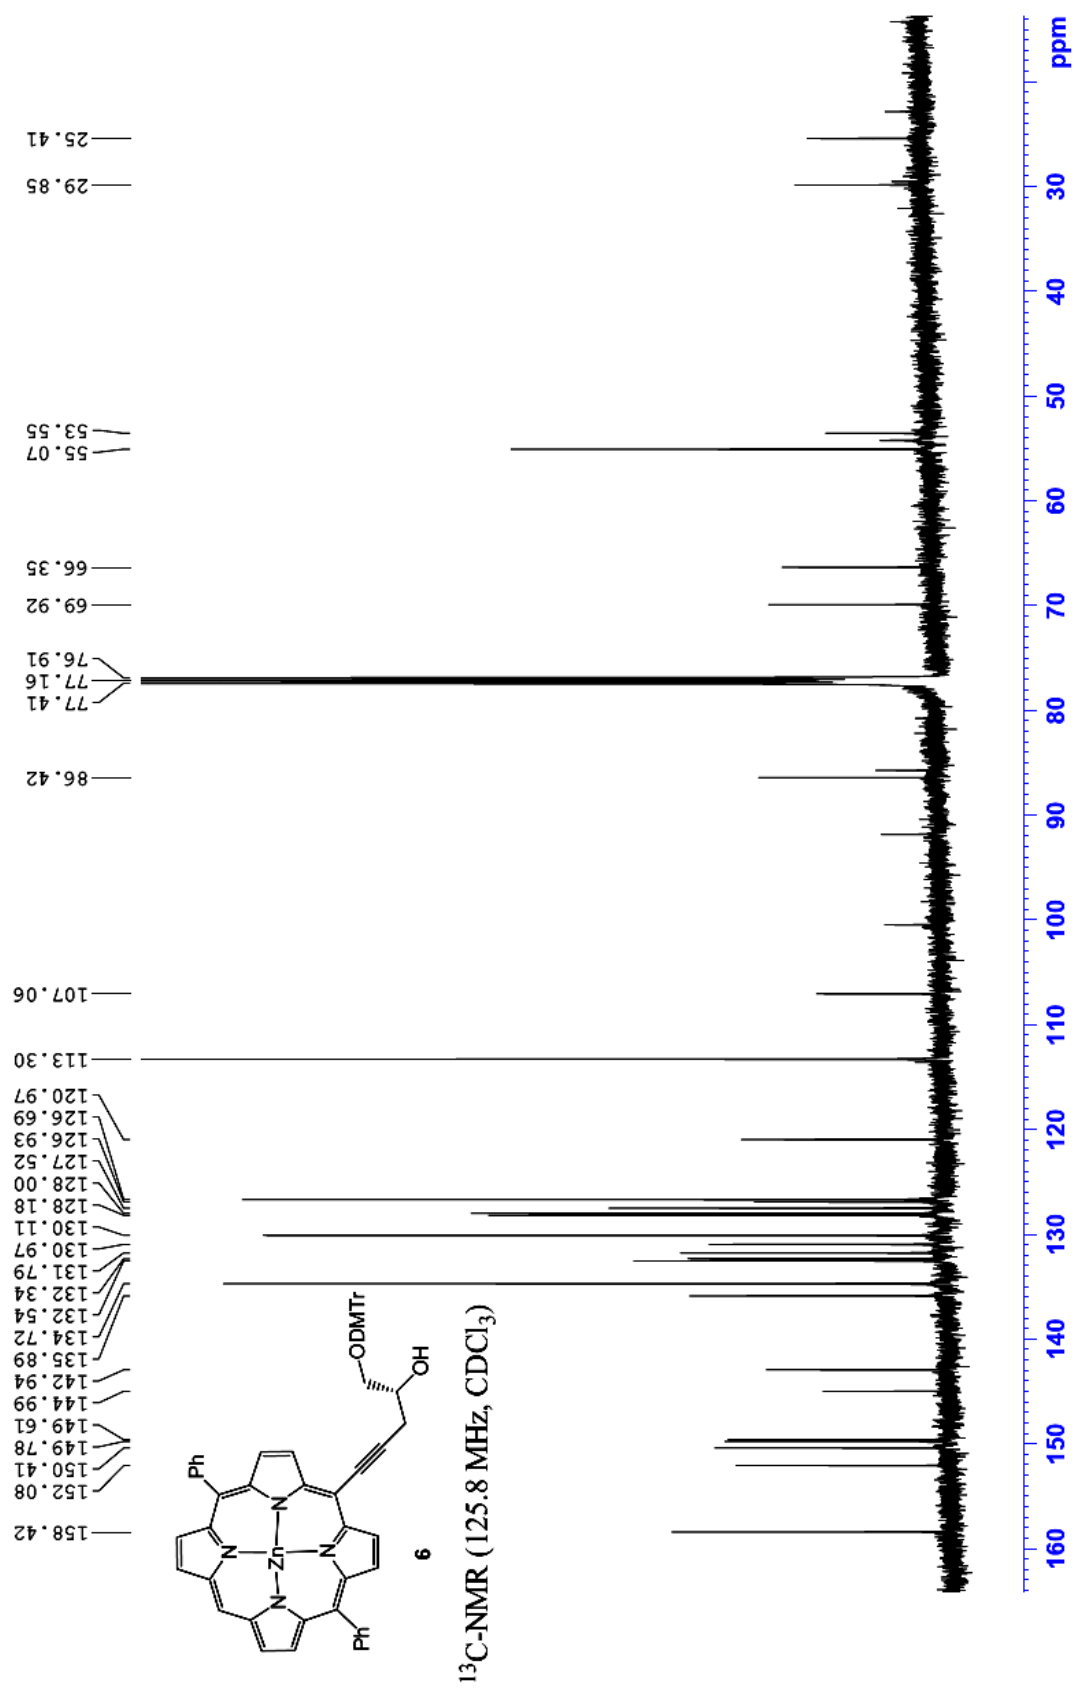

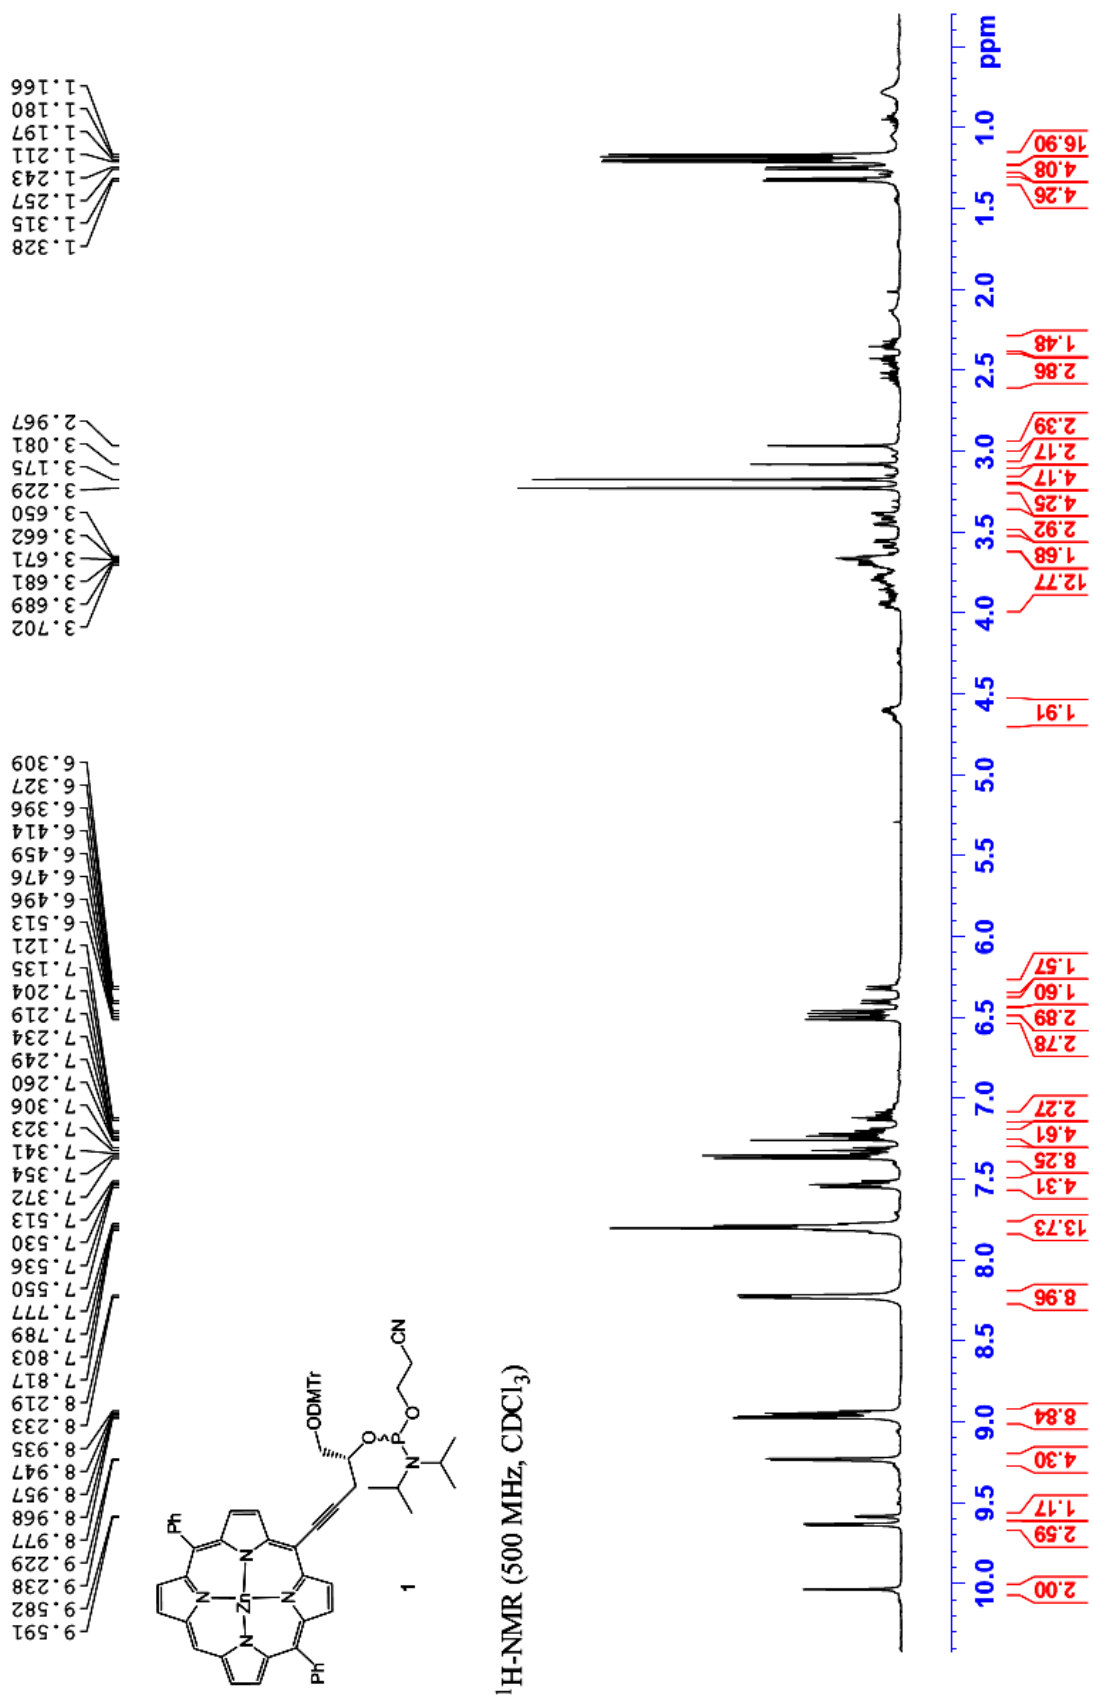

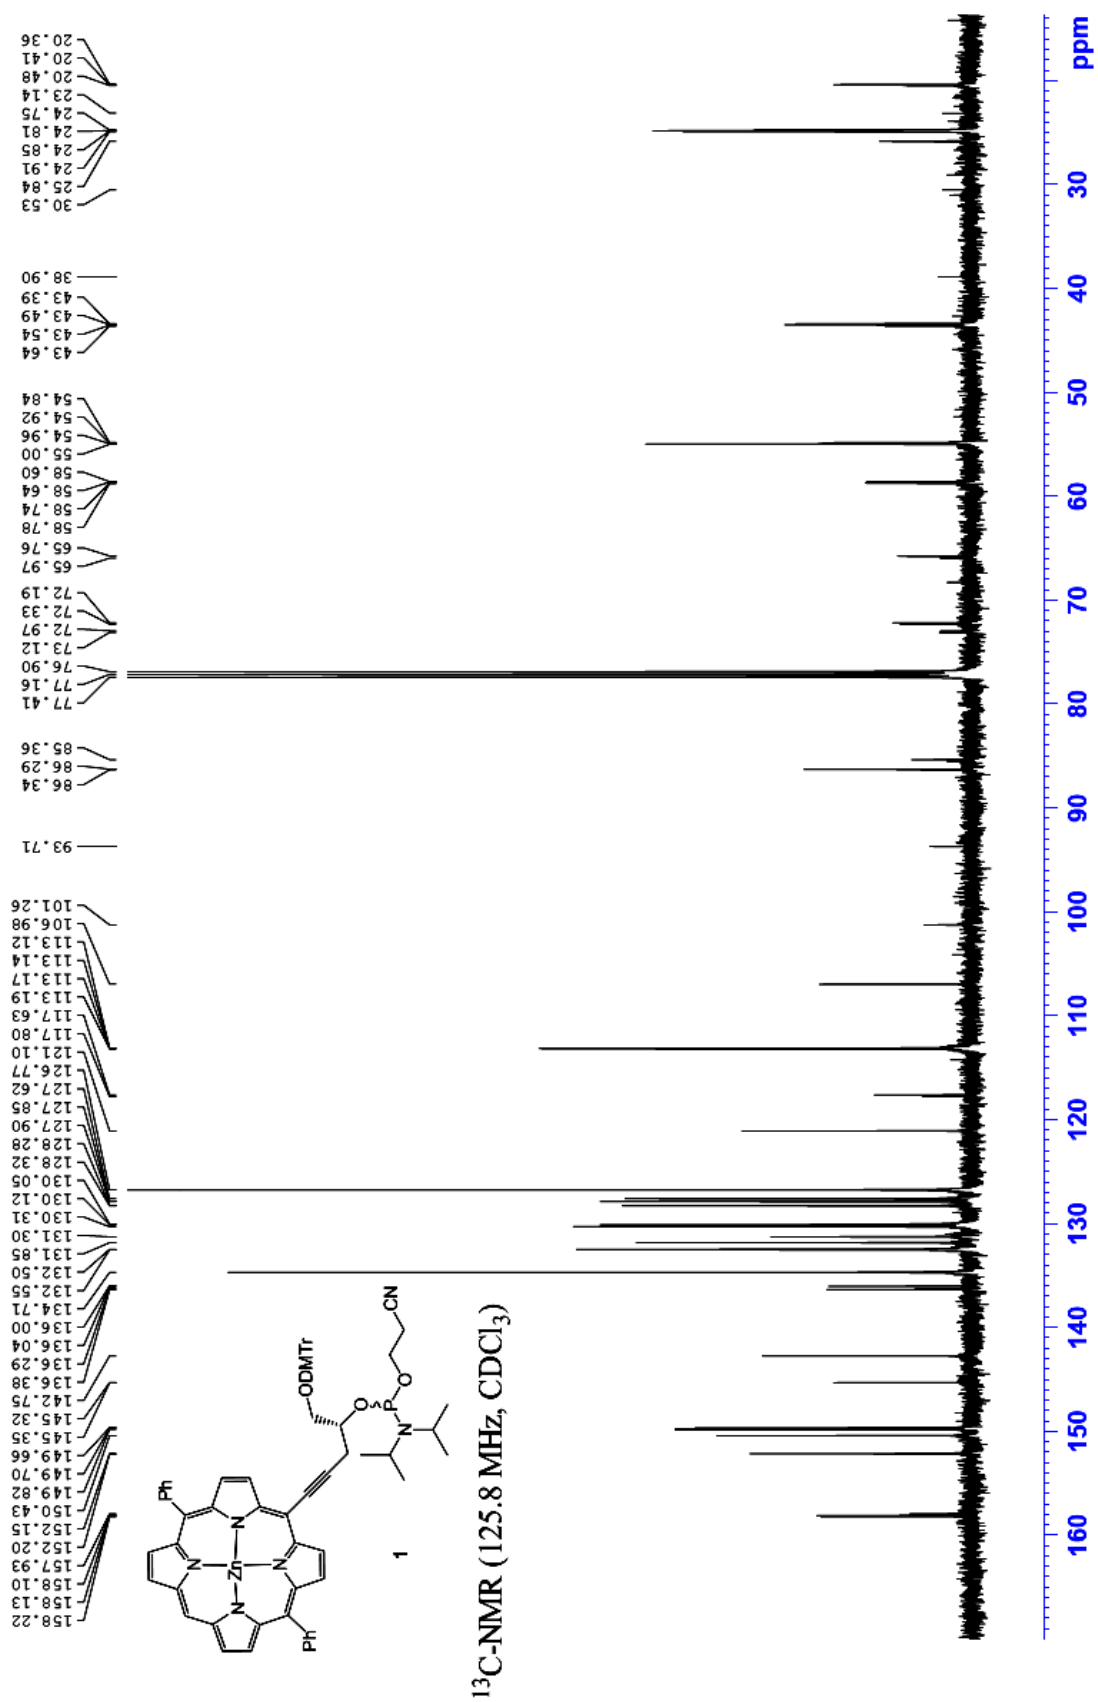

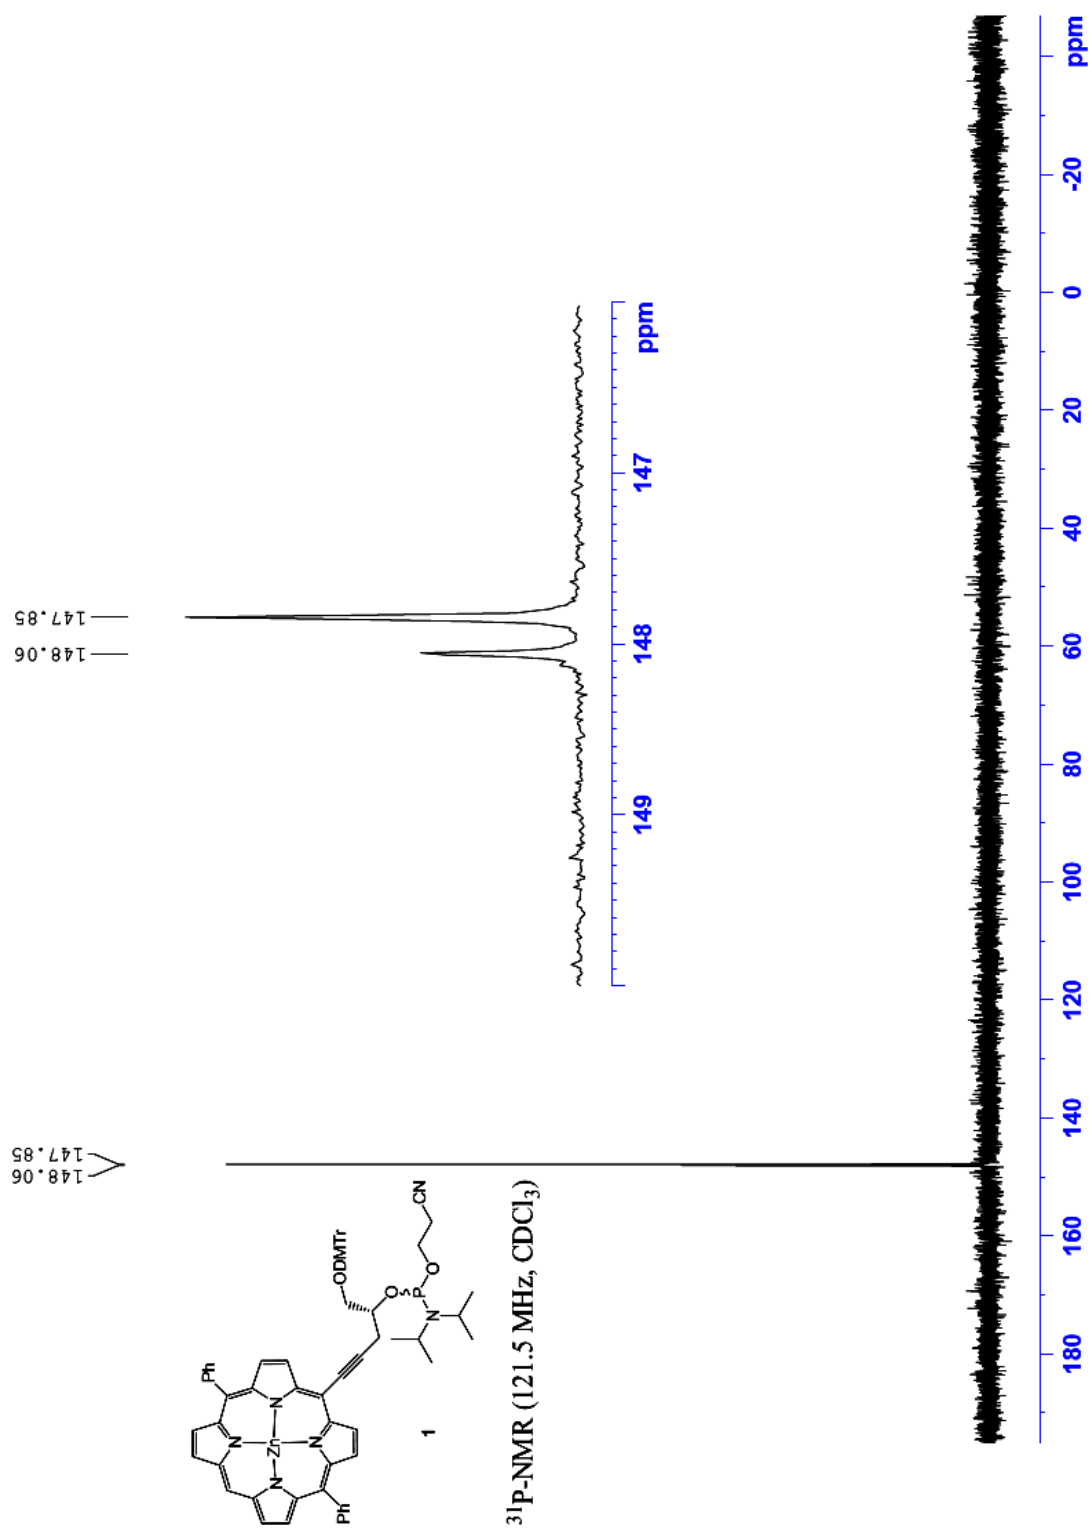

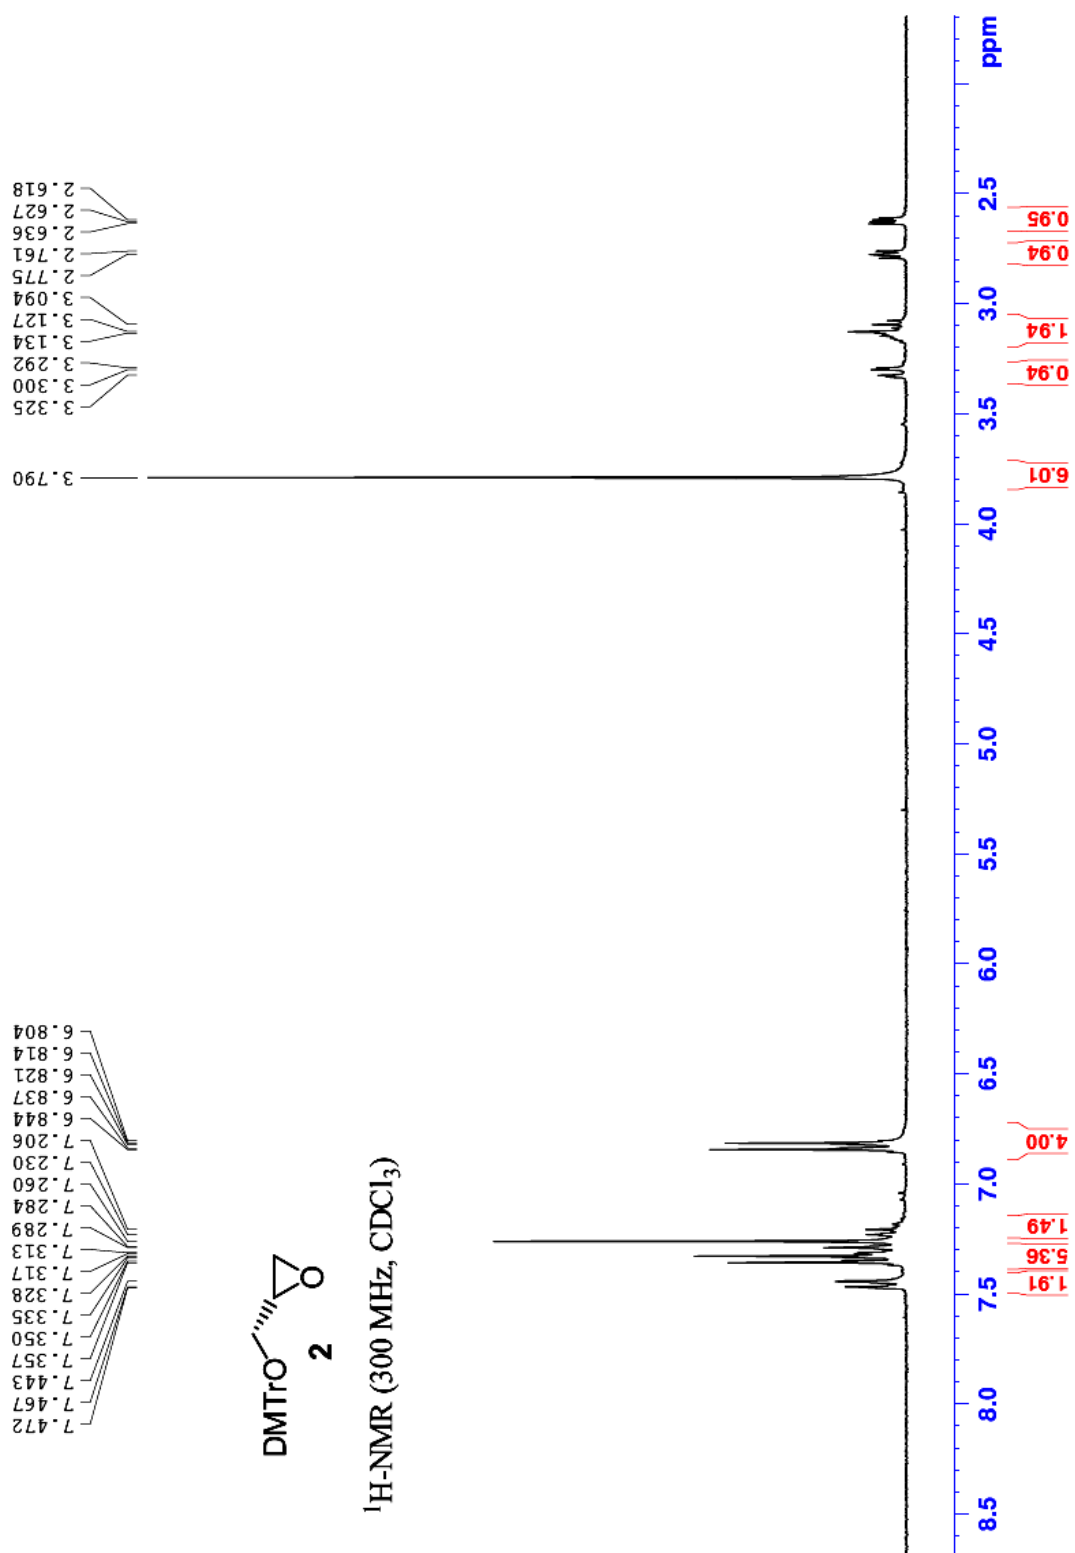

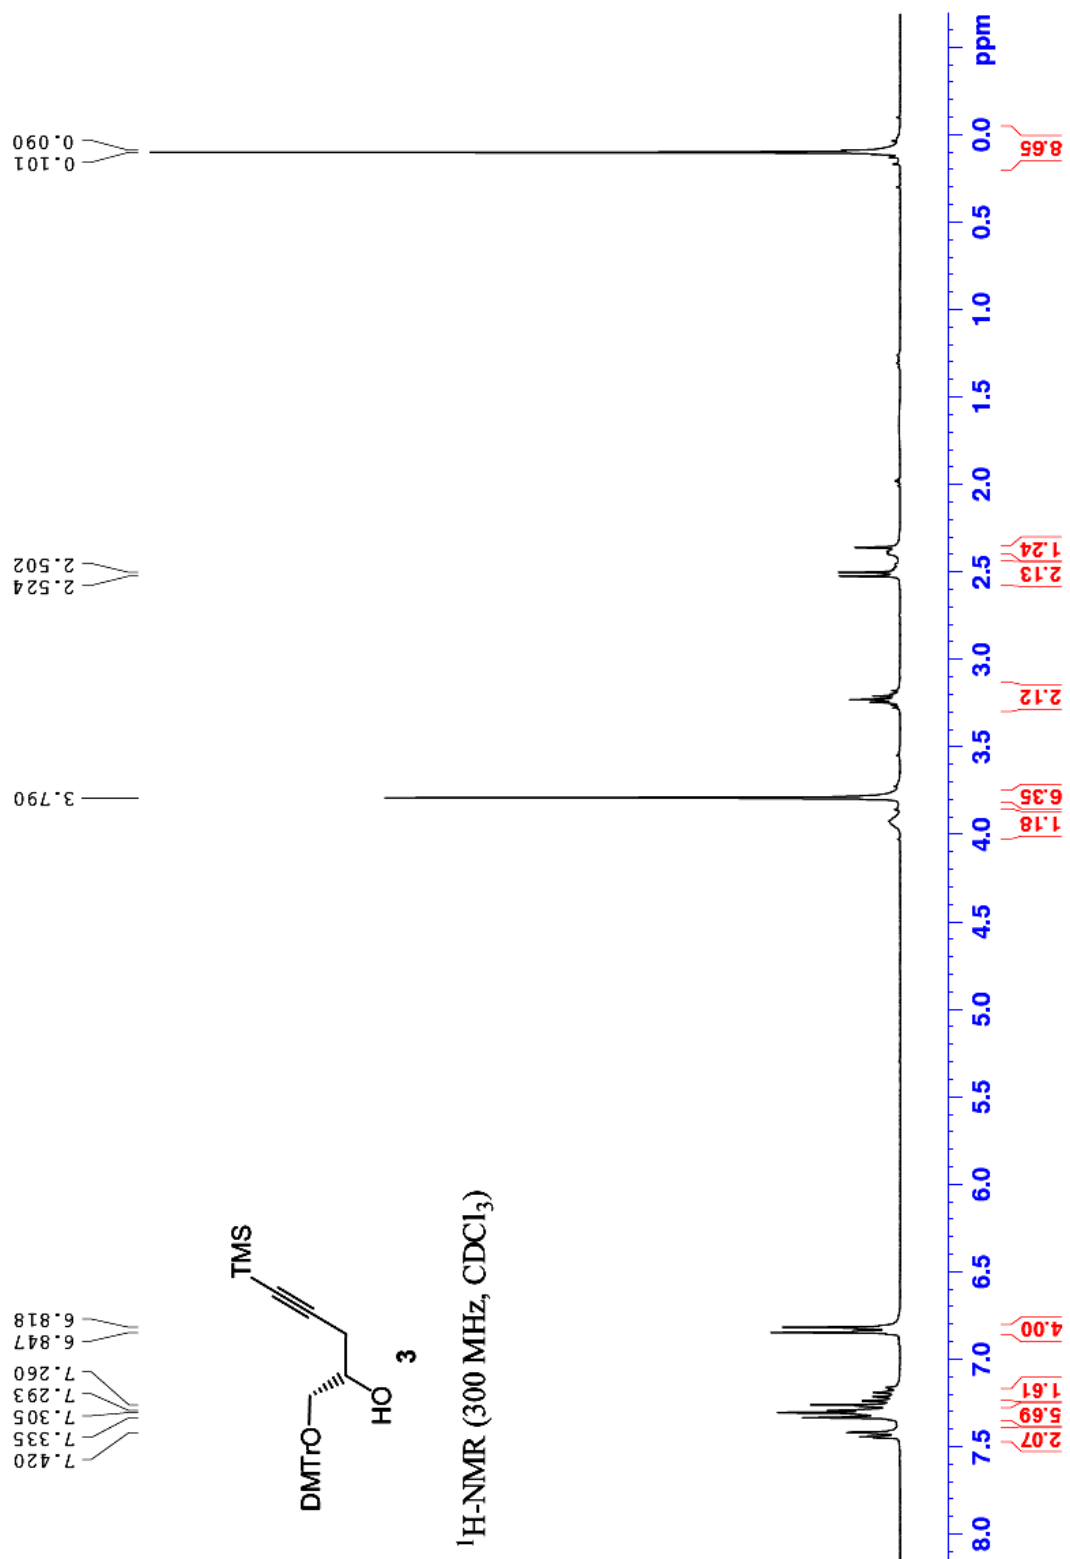

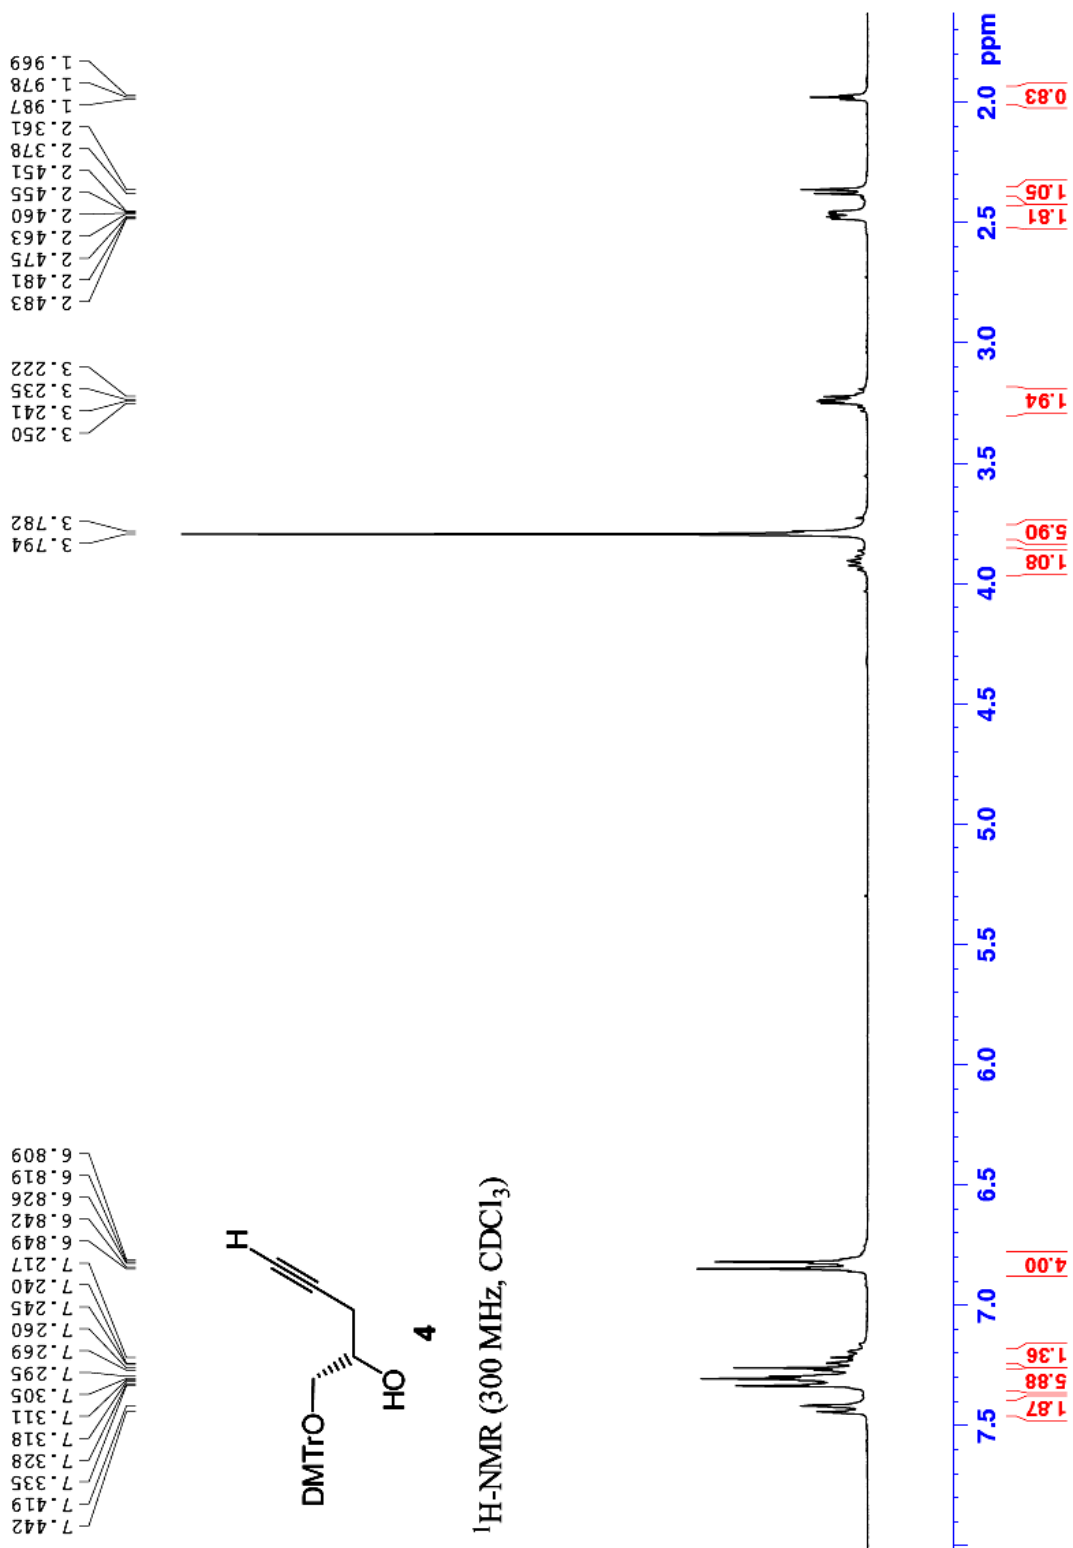



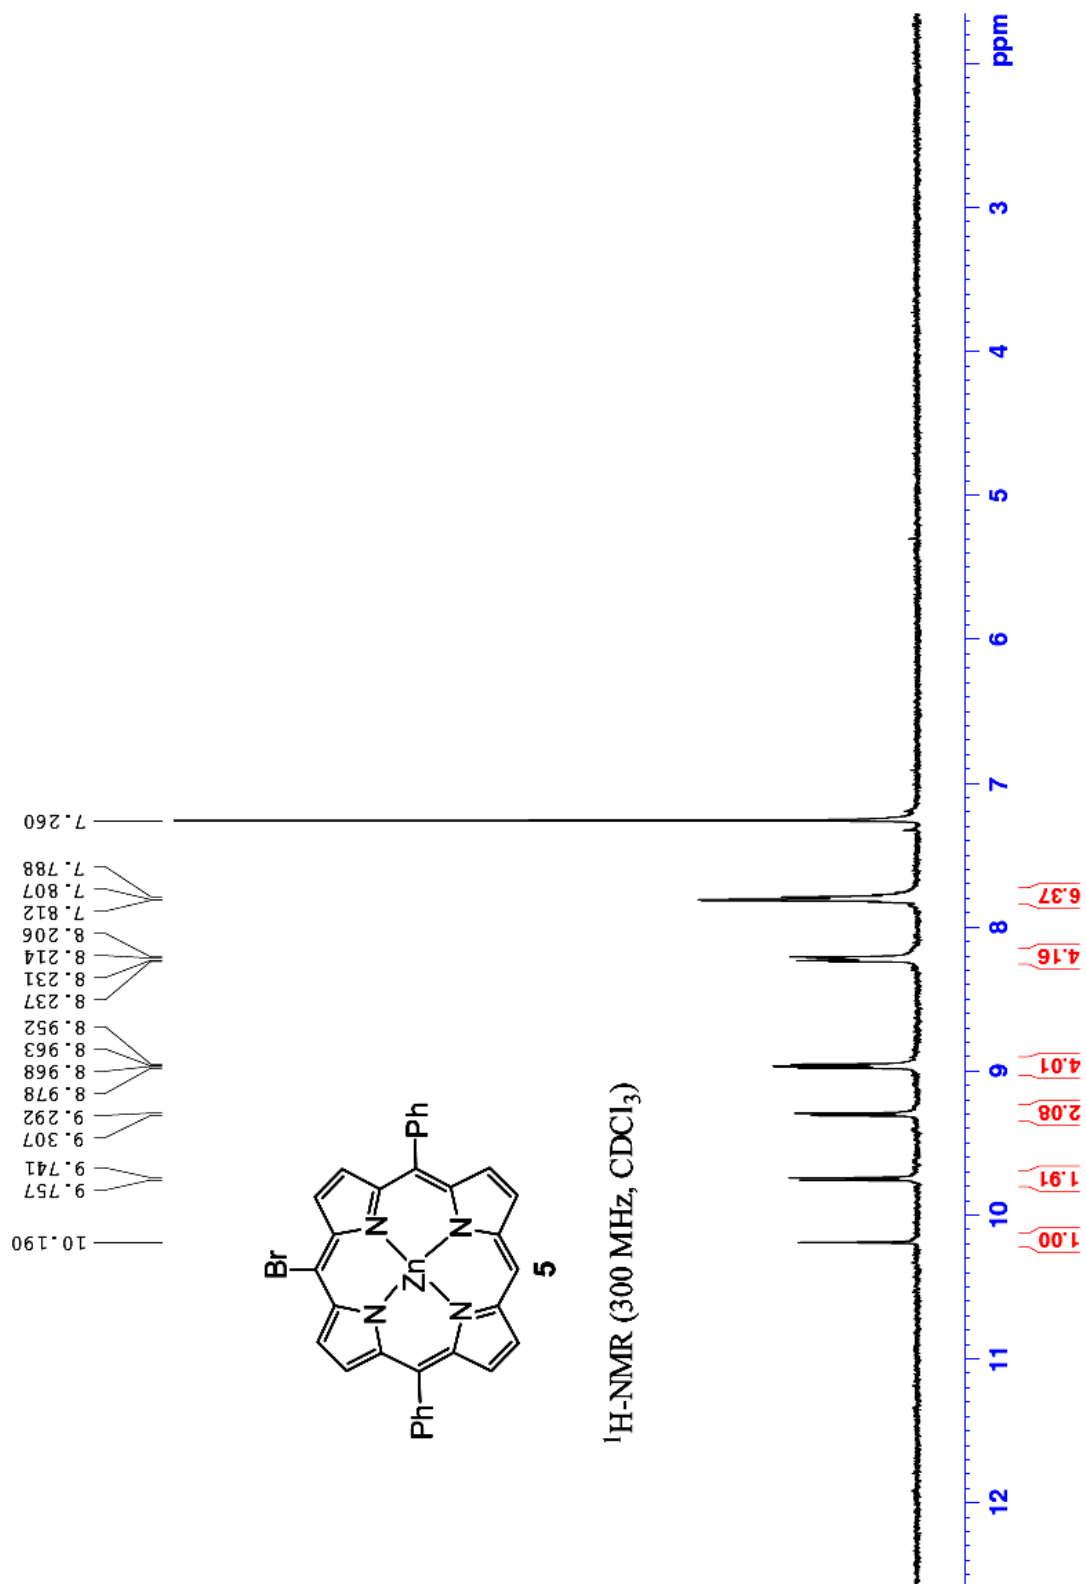

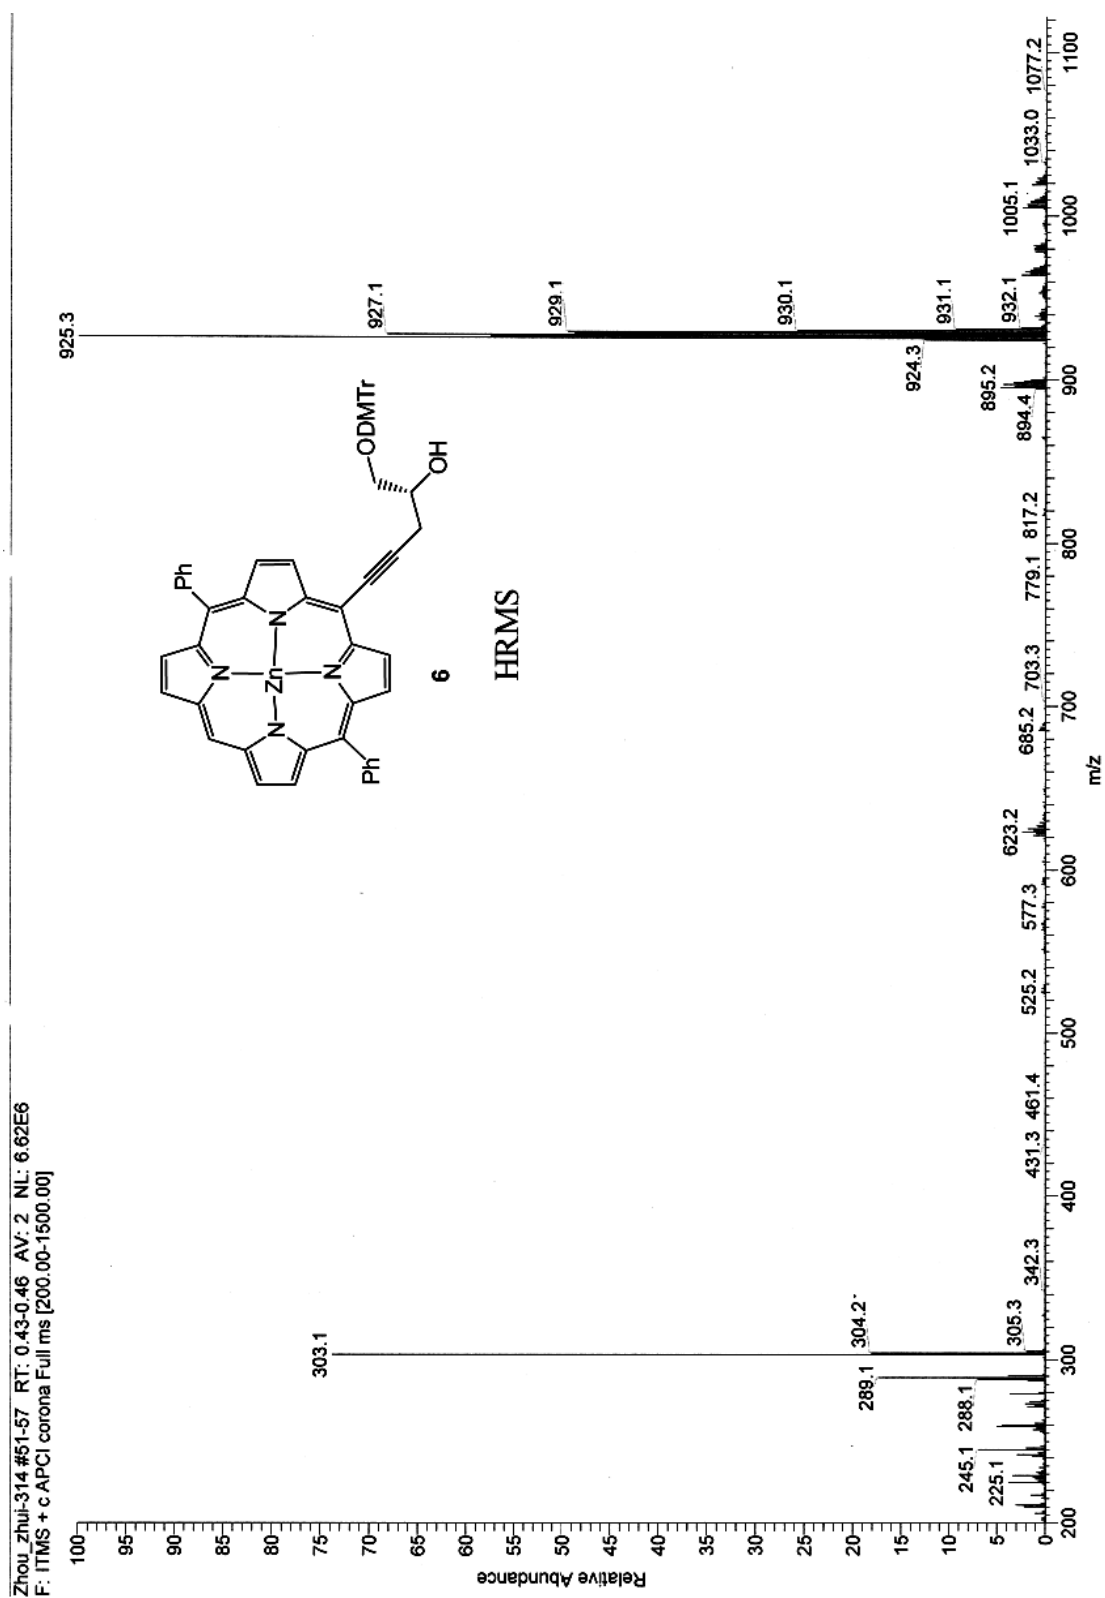

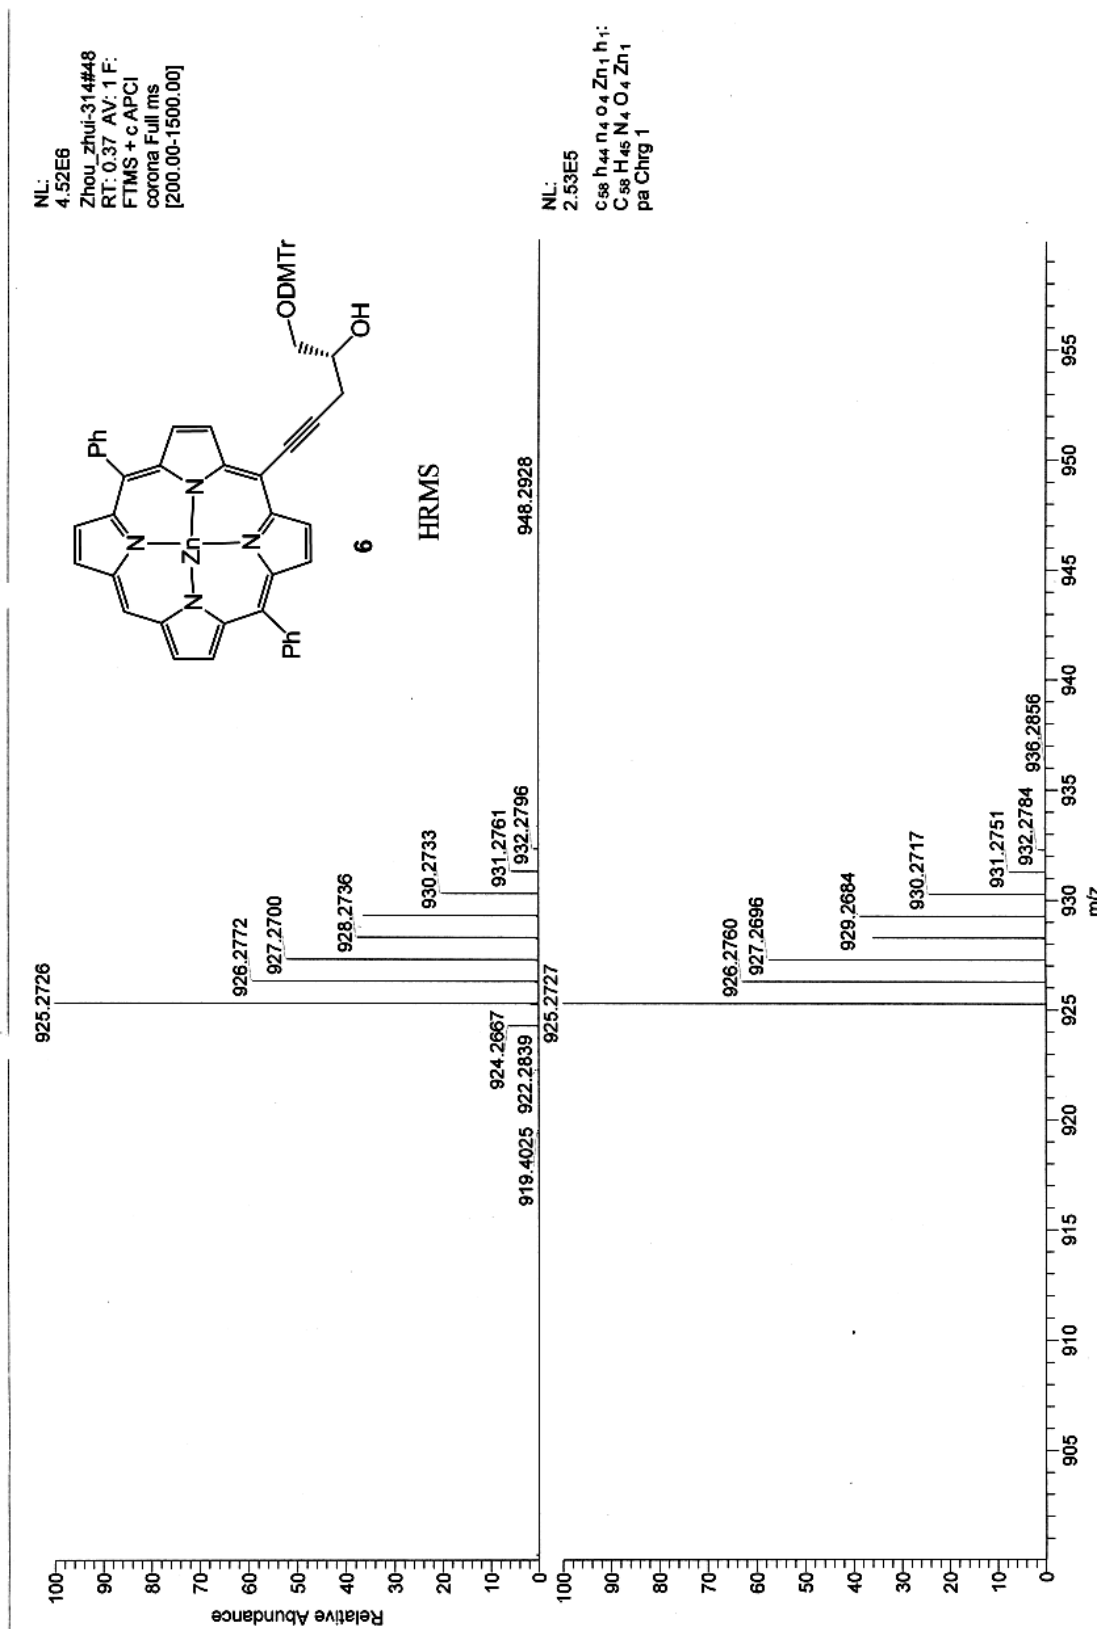

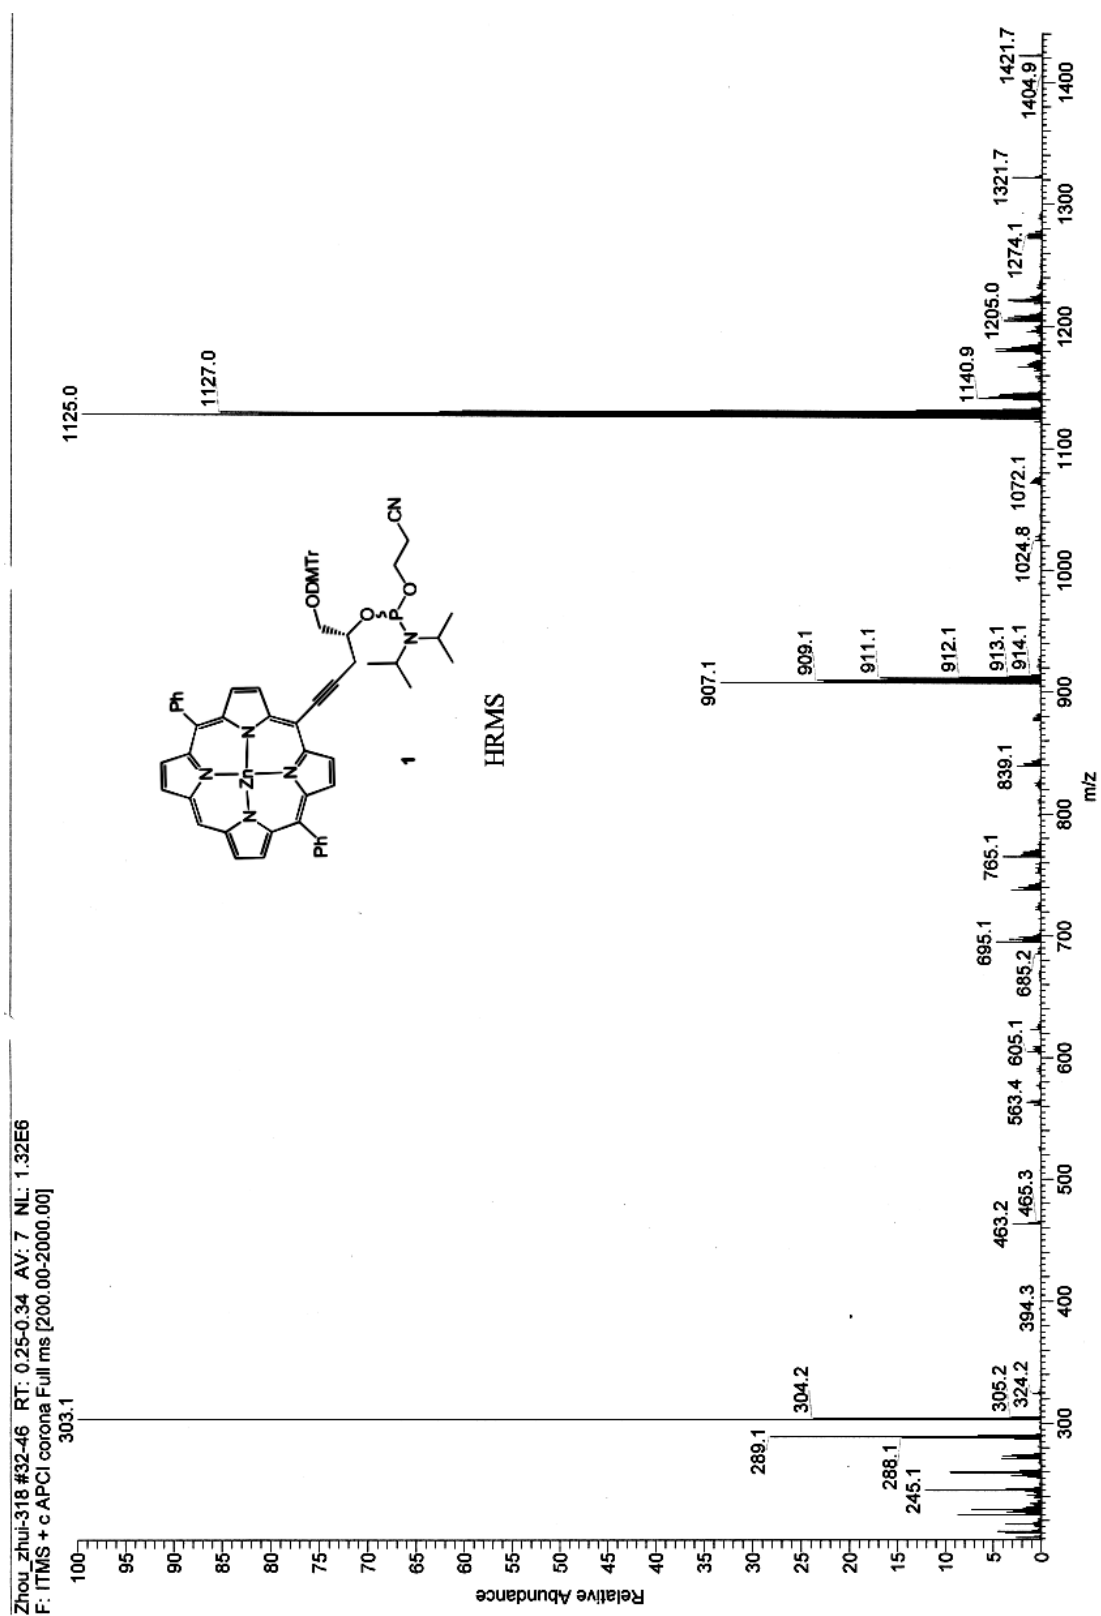

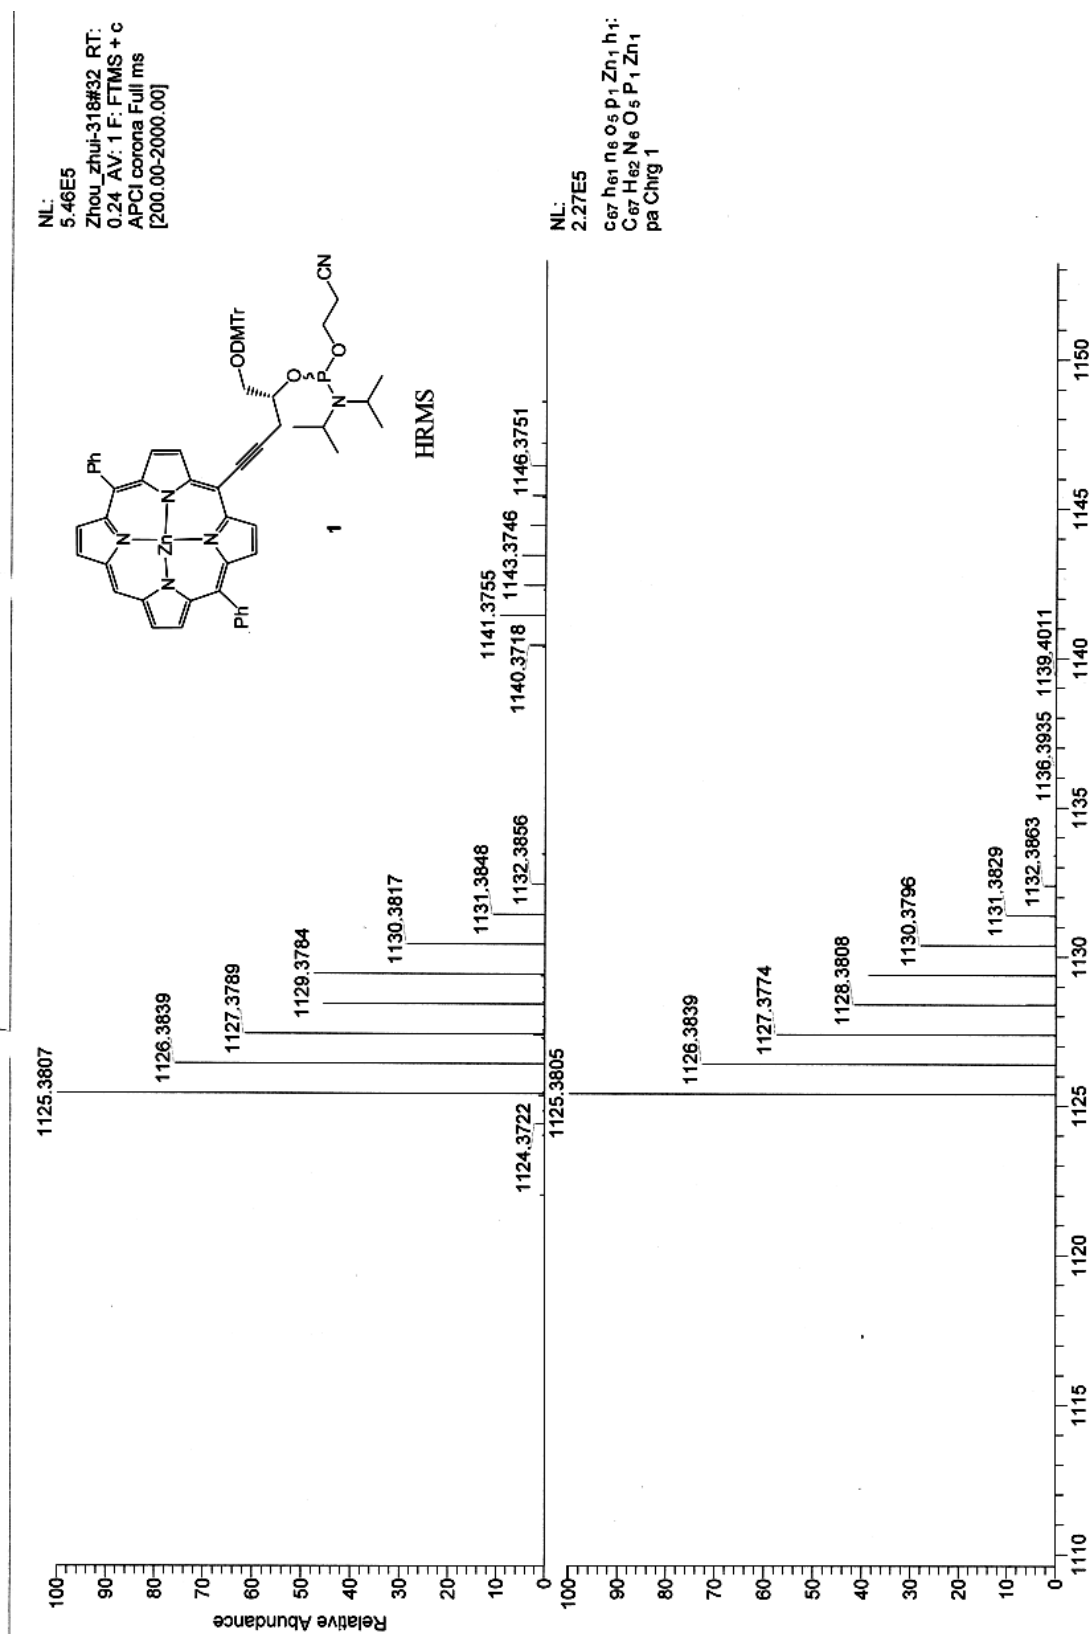

Supplement: c0ob00439a.pdf [file c0ob00439a.pdf]
